# Supplementary material for: Integrated Use of Molecular Techniques to Detect and Genetically Characterise DNA Viruses in Italian Wolves (Canis lupus italicus)
Source: MDPI journal article supplement (doi:10.3390/ani11082198), 2021-07-24
Supplement: s1 [file s1]

**Table S1.** *Carnivore protoparvovirus 1* nucleotide sequences obtained in this study and reference strains retrieved from GenBank used for analysis.

| GenBank ID | Strain                | Pathogen | Genome size (nt) | Host              | Sample                | Year | Origin   |
|------------|-----------------------|----------|------------------|-------------------|-----------------------|------|----------|
| AF306450   | 637                   | CPV-2b   | 1745             | Dog               | NA                    | 1996 | Italy    |
| AY742934   | CPV-447               | CPV-2b   | 4432             | Dog               | NA                    | 1995 | Germany  |
| AY742935   | CPV-U6                | CPV-2a   | 4432             | Dog               | NA                    | 1995 | Germany  |
| D26079     | Y1                    | CPV-2a   | 5075             | Dog               | NA                    | 1993 | Japan    |
| DQ354068   | RPPV                  | CPV-2a   | 1755             | Red panda         | NA                    | 2004 | China    |
| EF418569   | PT06                  | FPV      | 1850             | Lion              | Faeces                | 2006 | Portugal |
| EU145593   | 389/07                | FPV      | 1755             | Asian palm civet  | NA                    | 2007 | Hungary  |
| EU498688   | 134/04-1              | FPV      | 1755             | Cat               | Faeces                | 2004 | Italy    |
| EU659116   | CPV-5.us.79           | CPV-2    | 4269             | Dog               | NA                    | 1979 | USA      |
| EU659121   | CPV-411b.us.98        | CPV-2b   | 4269             | Dog               | NA                    | 1998 | USA      |
| FPU22185   | BFPV-1                | FPV      | 2256             | Arctic fox        | NA                    | 1983 | Finland  |
| FPU22188   | 377                   | FPV      | 1957             | Wildcat           | NA                    | 1993 | Germany  |
| GQ857595   | BFPV                  | FPV      | 1755             | Blue fox          | NA                    | 2008 | China    |
| JF422105   | PT09                  | FPV      | 1755             | Egyptian mongoose | Intestine, lymph node | 2009 | Portugal |
| JN867615   | CPV/Raccoon/GA/287/08 | CPV-2a   | 4627             | Raccoon           | NA                    | 2009 | USA      |
| JQ268284   | CPV-LZ2               | CPV-2b   | 5053             | Dog               | NA                    | 2011 | China    |
| JX411926   | PT10                  | CPV-2b   | 1755             | Stone marten      | Intestine, lymph node | 2010 | Portugal |
| JX475240   | AZ/16382-01/99        | CPV-2b   | 1755             | Wolf              | NA                    | 1999 | USA      |
| JX475241   | NM/16401-01/99        | CPV-2b   | 1755             | Wolf              | NA                    | 1999 | USA      |
| KF373569   | 603/1995              | CPV-2b   | 1745             | Dog               | NA                    | 1995 | Italy    |
| KF373599   | 461/2009              | CPV-2b   | 1745             | Dog               | NA                    | 2009 | Italy    |
| KF803600   | BJ-A68                | CPV-2a   | 1752             | Dog               | NA                    | 2010 | China    |
| KJ813848   | ND/1162/2013          | CPV-2c   | 1755             | Bobcat            | NA                    | 2013 | USA      |
| KJ813854   | ND/F205/2013          | CPV-2c   | 1755             | Puma              | NA                    | 2013 | USA      |
| KJ813863   | ND/M96/2013           | CPV-2b   | 1755             | Puma              | NA                    | 2013 | USA      |
| KJ813871   | VT/460/2013           | CPV-2a   | 1755             | Raccoon           | NA                    | 2013 | USA      |
| KJ813882   | NJ/1423/2012          | CPV-2b   | 1755             | Raccoon           | NA                    | 2012 | USA      |
| KM457120   | UY242                 | CPV-2c   | 4269             | Dog               | NA                    | 2010 | Uruguay  |
| KP682511   | 150                   | CPV-2c   | 1746             | Wolf              | Spleen                | 2011 | Spain    |
| KP682512   | 158                   | CPV-2b   | 1746             | Wolf              | Spleen                | 2012 | Spain    |
| KP682513   | 163                   | CPV-2c   | 1746             | Wolf              | Spleen                | 2012 | Spain    |

|          |                       |        |      |              |             |      |           |
|----------|-----------------------|--------|------|--------------|-------------|------|-----------|
| KP682516 | 171                   | CPV-2c | 1746 | Wolf         | Spleen      | 2013 | Spain     |
| KP682517 | 173                   | CPV-2c | 1746 | Wolf         | Spleen      | 2013 | Spain     |
| KP682520 | 351                   | FPV    | 1746 | Badger       | Spleen      | 2013 | Spain     |
| KP682521 | 417                   | CPV-2c | 1746 | Badger       | Spleen      | 2009 | Spain     |
| KP682523 | 154                   | CPV-2c | 1746 | Wolf         | Spleen      | 2012 | Spain     |
| KP682526 | 298                   | FPV    | 1746 | Stone marten | Spleen      | 2002 | Spain     |
| KP682527 | 172                   | CPV-2c | 1746 | Wolf         | Spleen      | 2011 | Spain     |
| KP682528 | 170                   | CPV-2c | 1746 | Wolf         | Spleen      | 2011 | Spain     |
| KP682530 | 160                   | CPV-2c | 1678 | Wolf         | Spleen      | 2012 | Spain     |
| KR002794 | CPV/CN/HB3/2013       | CPV-2a | 4269 | Dog          | NA          | 2013 | China     |
| KU662350 | W52/PT/05             | CPV-2b | 1755 | Wolf         | Liver       | 2005 | Portugal  |
| KU662351 | Sm14/PT/08            | CPV-2c | 1755 | Stone marten | Spleen      | 2008 | Portugal  |
| KX268106 | TR-02                 | CPV-2b | 1752 | Dog          | NA          | 2013 | Turkey    |
| KX774252 | Bel2015-02            | CPV-2b | 5020 | Dog          | NA          | 2015 | Brazil    |
| KX943311 | IZSSI/3201int1        | FPV    | 1745 | Cat          | Intestine   | 2015 | Italy     |
| LC214970 | CPV/dog/HCM/22/2013   | CPV-2a | 4269 | Dog          | NA          | 2013 | Vietnam   |
| LC216904 | CPV/dog/HCM/2/2013    | CPV-2c | 1755 | Dog          | NA          | 2013 | Indonesia |
| M23255   | CPV-d                 | CPV-2  | 2605 | Dog          | NA          | 1988 | USA       |
| MF177227 | 202-09                | CPV-2c | 4269 | Dog          | NA          | 2009 | France    |
| MF177232 | 201-98                | CPV-2b | 4269 | Dog          | NA          | 1998 | Italy     |
| MF177270 | E23                   | CPV-2c | 4269 | Dog          | NA          | 2011 | Ecuador   |
| MF416372 | NYC/Bronx/poolP16-17  | CPV-2c | 4809 | Mouse        | Faeces      | 2015 | USA       |
| MF423123 | CPV/Coyote/C16/NL     | CPV-2b | 4468 | Coyote       | NA          | 2014 | Canada    |
| MF423125 | CPV/Coyote/C67/NL     | CPV-2a | 4468 | Coyote       | NA          | 2014 | Canada    |
| MF510157 | CPV/IZSSI/2743/17     | CPV-2c | 4450 | Dog          | Intestine   | 2017 | Italy     |
| MG434741 | CPV/IZSSI/PA5610/2017 | CPV-2a | 4381 | Dog          | Rectal swab | 2017 | Italy     |
| MH491866 | 16450                 | CPV-2b | 1752 | Dog          | NA          | 2011 | Italy     |
| MH491882 | 27507                 | CPV-2a | 1752 | Dog          | NA          | 2014 | Italy     |
| MH491898 | 31179                 | CPV-2b | 1752 | Dog          | NA          | 2015 | Italy     |
| MH491910 | 4495                  | CPV-2a | 1752 | Dog          | NA          | 2008 | Italy     |
| MH491914 | 15263                 | CPV-2c | 1752 | Dog          | NA          | 2011 | Italy     |
| MH491940 | 26156                 | CPV-2b | 1737 | Dog          | NA          | 2014 | Italy     |
| MH614271 | Majella/pack7/07      | CPV-2b | 1752 | Wolf         | Faeces      | 2017 | Italy     |
| MK295775 | JL-3                  | FPV    | 1755 | Cat          | NA          | 2017 | China     |
| MK348090 | 392/2013              | CPV-2b | 1755 | Dog          | Faeces      | 2013 | Italy     |
| MK348102 | 1418/2016             | CPV-2b | 1755 | Dog          | Faeces      | 2016 | Italy     |
| MK348104 | 850/2017              | CPV-2b | 1755 | Dog          | Faeces      | 2017 | Italy     |

|                 |                                         |               |            |              |                  |             |              |
|-----------------|-----------------------------------------|---------------|------------|--------------|------------------|-------------|--------------|
| MK413726        | 149/15                                  | FPV           | 4269       | Cat          | Intestine        | 2015        | Italy        |
| MK413742        | PA13600/17                              | CPV-2b        | 4269       | Dog          | Spleen           | 2017        | Italy        |
| MK413743        | PA15423/16                              | CPV-2c        | 4269       | Cat          | Spleen           | 2016        | Italy        |
| MK806285        | IZSSI/PA5632/19                         | CPV-2c        | 4269       | Dog          | Spleen           | 2019        | Italy        |
| MK895486        | IZSSI/PA1464/19/idYV2                   | CPV-2c        | 4269       | Dog          | Rectal swab      | 2018        | Nigeria      |
| MN119597        | CH-HN-D22                               | CPV-2c        | 1755       | Dog          | NA               | 2019        | China        |
| MN451663        | 39                                      | CPV-2b        | 4269       | Dog          | Faeces           | 1984        | USA          |
| MN451682        | 609                                     | CPV-2c        | 4269       | Dog          | Faeces           | 2018        | Nigeria      |
| MN603976        | Tasman island/Tasmania/Felis catus/2010 | FPV           | 1744       | Cat          | NA               | 2010        | Australia    |
| MN832850        | Taiwan/2018                             | CPV-2c        | 4960       | Pangolin     | NA               | 2018        | Taiwan       |
| MT106236        | DN02                                    | CPV-2c        | 4269       | Dog          | NA               | 2017        | Vietnam      |
| MT274377        | 51                                      | FPV           | 1755       | Red fox      | NA               | 2017        | Italy        |
| MT274378        | 245/19-1478                             | FPV           | 1755       | Badger       | Intestine        | 2019        | Italy        |
| MT353760        | 289/19-5518                             | CPV-2c        | 1755       | Badger       | Intestine        | 2019        | Italy        |
| MT353761        | 415/19-3530                             | CPV-2b        | 1755       | Wolf         | Intestine        | 2019        | Italy        |
| MT353762        | 289/19-5860                             | CPV-2b        | 1755       | Badger       | Intestine        | 2019        | Italy        |
| MT353763        | 289/19-5771                             | CPV-2b        | 1755       | Stone marten | Intestine        | 2019        | Italy        |
| MT353764        | 289/19-5624                             | CPV-2b        | 1755       | Badger       | Intestine        | 2019        | Italy        |
| MT454908        | 67/20-1302                              | CPV-2c        | 736        | Wolf         | Intestine        | 2020        | Italy        |
| MT454909        | 67/20-1106                              | CPV-2c        | 736        | Wolf         | Intestine        | 2020        | Italy        |
| MT454910        | 663/19-6976                             | CPV-2c        | 736        | Wolf         | NA               | 2020        | Italy        |
| MT454911        | 67/20-276                               | CPV-2b        | 736        | Wolf         | Intestine        | 2020        | Italy        |
| MT454913        | 145/20-1863                             | CPV-2b        | 736        | Wolf         | Intestine        | 2020        | Italy        |
| MT454914        | 145/20-1788                             | CPV-2a        | 736        | Wolf         | Intestine        | 2020        | Italy        |
| MT454915        | 145/20-1274                             | CPV-2b        | 736        | Wolf         | Intestine        | 2020        | Italy        |
| MT454916        | 51/20-178                               | FPV           | 736        | Red fox      | Spleen           | 2014        | Italy        |
| MT454917        | 51/20-114                               | FPV           | 736        | Red fox      | NA               | 2014        | Italy        |
| MW182703        | 2018/20                                 | CPV-2c        | 1755       | Dog          | NA               | 2018        | China        |
| <b>MW829208</b> | <b>451</b>                              | <b>CPV-2b</b> | <b>532</b> | <b>Wolf</b>  | <b>Tongue</b>    | <b>2017</b> | <b>Italy</b> |
| <b>MW829209</b> | <b>453</b>                              | <b>CPV-2b</b> | <b>532</b> | <b>Wolf</b>  | <b>Tongue</b>    | <b>2018</b> | <b>Italy</b> |
| <b>MW829210</b> | <b>454</b>                              | <b>CPV-2b</b> | <b>532</b> | <b>Wolf</b>  | <b>Intestine</b> | <b>2018</b> | <b>Italy</b> |
| <b>MW829211</b> | <b>456</b>                              | <b>CPV-2b</b> | <b>532</b> | <b>Wolf</b>  | <b>Intestine</b> | <b>2018</b> | <b>Italy</b> |
| <b>MW829212</b> | <b>457</b>                              | <b>CPV-2b</b> | <b>532</b> | <b>Wolf</b>  | <b>Intestine</b> | <b>2018</b> | <b>Italy</b> |
| <b>MW829213</b> | <b>458</b>                              | <b>CPV-2b</b> | <b>532</b> | <b>Wolf</b>  | <b>Intestine</b> | <b>2018</b> | <b>Italy</b> |
| <b>MW829214</b> | <b>188</b>                              | <b>CPV-2b</b> | <b>532</b> | <b>Wolf</b>  | <b>Tongue</b>    | <b>2018</b> | <b>Italy</b> |
| <b>MW829215</b> | <b>189</b>                              | <b>CPV-2b</b> | <b>532</b> | <b>Wolf</b>  | <b>Tongue</b>    | <b>2018</b> | <b>Italy</b> |
| <b>MW829216</b> | <b>190</b>                              | <b>CPV-2b</b> | <b>532</b> | <b>Wolf</b>  | <b>Intestine</b> | <b>2018</b> | <b>Italy</b> |

|                 |            |               |            |             |                  |             |              |
|-----------------|------------|---------------|------------|-------------|------------------|-------------|--------------|
| <b>MW829217</b> | <b>193</b> | <b>CPV-2b</b> | <b>532</b> | <b>Wolf</b> | <b>Intestine</b> | <b>2018</b> | <b>Italy</b> |
| <b>MW829218</b> | <b>195</b> | <b>CPV-2b</b> | <b>532</b> | <b>Wolf</b> | <b>Intestine</b> | <b>2018</b> | <b>Italy</b> |
| <b>MW829219</b> | <b>197</b> | <b>CPV-2b</b> | <b>532</b> | <b>Wolf</b> | <b>Intestine</b> | <b>2019</b> | <b>Italy</b> |
| <b>MW829220</b> | <b>198</b> | <b>FPV</b>    | <b>532</b> | <b>Wolf</b> | <b>Tongue</b>    | <b>2019</b> | <b>Italy</b> |

Note: CPV = canine parvovirus type 2, CPV-2a = canine parvovirus 2a, CPV-2b = canine parvovirus 2b, CPV-2c = canine parvovirus

2c, FPV = feline panleukopenia virus, NA = not available, nt = nucleotides.

In bold: *Carnivore protoparvovirus 1* sequences obtained in this study.
