# Supplementary material for: Integrated Use of Molecular Techniques to Detect and Genetically Characterise DNA Viruses in Italian Wolves (Canis lupus italicus)
Source: MDPI journal article supplement (doi:10.3390/ani11082198), 2021-07-24
Supplement: s1 [file s1]

**Table S2.** Canine adenovirus nucleotide sequences obtained in this study and reference strains retrieved from GenBank used for analysis.

| GenBank ID                 | Strain        | Pathogen      | Sequence size (nts) | Host        | Sample        | Year        | Origin        |
|----------------------------|---------------|---------------|---------------------|-------------|---------------|-------------|---------------|
| JN252129                   | PPV1          | BtAdV         | 31616               | Bat         | Liver/kidney  | 2011        | Germany       |
| KP840545 + KP840544        | 113-5L        | CAdV-1        | 2718 + 1632         | Red fox     | Liver         | 2011        | Italy         |
| KP840547 + KP840546        | 417-L         | CAdV-1        | 2718 + 1632         | Dog         | Liver         | 2013        | Italy         |
| KP840549 + KP840548        | 574-RS        | CAdV-1        | 2718 + 1632         | Dog         | Rectal swab   | 2013        | Italy         |
| KX545420                   | ITL2015       | CAdV-1        | 30531               | Wolf        | Liver         | 2015        | Italy         |
| MF344666 + MF344672        | 602-07        | CAdV-1        | 2718 + 1632         | Red fox     | Spleen        | 2008        | Norway        |
| MF344667 + MF344673        | 603-06        | CAdV-1        | 2718 + 1632         | Arctic fox  | Liver         | 1997-98     | Norway        |
| MF344668 + MF344674        | 603-07        | CAdV-1        | 2718 + 1632         | Arctic fox  | Kidney        | 1997-98     | Norway        |
| MF344669 + MF344675        | 603-10        | CAdV-1        | 2718 + 1632         | Arctic fox  | Spleen        | 1999-00     | Norway        |
| MF344670 + MF344676        | 603-12        | CAdV-1        | 2718 + 1632         | Arctic fox  | Spleen        | 2001-02     | Norway        |
| MF344671 + MF344677        | 603-13        | CAdV-1        | 2718 + 1632         | Arctic fox  | Lymph node    | 1999-00     | Norway        |
| MH048659                   | 835           | CAdV-1        | 30534               | Wolf        | Liver         | 2015        | France        |
| MH105809 + MH105810        | 874           | CAdV-1        | 2718 + 1632         | Wolf        | Tongue        | 2014        | Italy         |
| <b>MW829200 + MW829199</b> | <b>452</b>    | <b>CAdV-1</b> | <b>2718 + 1632</b>  | <b>Wolf</b> | <b>Spleen</b> | <b>2017</b> | <b>Italy</b>  |
| NC_001734                  | RI261         | CAdV-1        | 30536               | Dog         | NA            | 1996        | Great Britain |
| U55001                     | CLL           | CAdV-1        | 30288               | Dog/vaccine | Kidney        | 1996        | NA            |
| U77082                     | TorontoA26/61 | CAdV-2        | 31323               | Dog/vaccine | NA            | 1961        | Canada        |

Note: NA = not available, nt = nucleotides.

In bold: Canine adenovirus sequences obtained in this study.
