# Supplementary material for: Integrated Use of Molecular Techniques to Detect and Genetically Characterise DNA Viruses in Italian Wolves (Canis lupus italicus)
Source: MDPI journal article supplement (doi:10.3390/ani11082198), 2021-07-24
Supplement: s1 [file s1]

**Table S3.** Canine circovirus nucleotide sequences obtained in this study and reference strains retrieved from GenBank used for analysis.

| GenBank ID          | Strain       | Genome size (nt) | Host    | Sample                | Year | Origin         | I | P |
|---------------------|--------------|------------------|---------|-----------------------|------|----------------|---|---|
| JQ821392            | 214          | 2063             | Dog     | Serum                 | 2011 | USA            |   |   |
| KC241982 (NC020904) | UCD1-1698    | 2063             | Dog     | Liver                 | 2011 | USA            |   |   |
| KC241983            | UCD3-478     | 2063             | Dog     | Blood                 | 2011 | USA            |   |   |
| KC241984            | UCD2-32162   | 2063             | Dog     | Faeces                | 2011 | USA            |   |   |
| KF887949            | Ha13         | 2063             | Dog     | Blood                 | 2013 | Germany        |   |   |
| KJ530972            | Bari/411-13  | 2063             | Dog     | Intestine             | 2013 | Italy          |   |   |
| KP260925            | VS7100001    | 2063             | Red fox | Serum                 | 2013 | United Kingdom |   |   |
| KP260926            | VS7100003    | 2063             | Red fox | Serum                 | 2013 | United Kingdom |   |   |
| KP260927            | VS7100005    | 2063             | Red fox | Serum                 | 2013 | United Kingdom |   |   |
| KP941114            | 55590        | 2055             | Red fox | Faeces                | 2014 | Croatia        |   |   |
| KT283604            | FUBerlin-JRS | 2063             | Dog     | Spleen                | 2014 | Germany        |   |   |
| KT734812            | CB6293/1-14  | 2063             | Wolf    | Mesenteric lymph node | 2014 | Italy          |   |   |
| KT734813            | AZ2972-13    | 2063             | Dog     | Intestine             | 2013 | Italy          |   |   |
| KT734814            | TE4016-13    | 2063             | Wolf    | Spleen                | 2013 | Italy          |   |   |
| KT734815            | AZ4133/1-13  | 2063             | Wolf    | Spleen                | 2013 | Italy          |   |   |
| KT734816            | AZ4438-13    | 2063             | Badger  | Intestine             | 2013 | Italy          |   |   |
| KT734817            | AZ5212/1-14  | 2063             | Dog     | Liver                 | 2014 | Italy          |   |   |
| KT734818            | AZ5212/2-14  | 2063             | Dog     | Lung                  | 2014 | Italy          |   |   |
| KT734819            | AZ5586-13    | 2063             | Wolf    | Lung                  | 2013 | Italy          |   |   |
| KT734820            | AZ663/1-13   | 2063             | Wolf    | Spleen                | 2013 | Italy          |   |   |
| KT734821            | TE6685/1-13  | 2063             | Dog     | Brain                 | 2013 | Italy          |   |   |
| KT734822            | TE7482-13    | 2063             | Wolf    | Intestine             | 2013 | Italy          |   |   |
| KT734823            | PE8575/1-13  | 2063             | Dog     | Mesenteric lymph node | 2013 | Italy          |   |   |
| KT734824            | AZ663/2-13   | 2063             | Wolf    | Intestine             | 2013 | Italy          |   |   |
| KT734825            | TE6685/2-13  | 2063             | Dog     | Lung                  | 2013 | Italy          |   |   |
| KT734826            | PE8575/2-13  | 2063             | Dog     | Intestine             | 2013 | Italy          |   |   |
| KT734827            | AZ4133/2-13  | 2063             | Wolf    | Intestine             | 2013 | Italy          |   |   |
| KT734828            | CB6293/2-14  | 2063             | Wolf    | Intestine             | 2014 | Italy          |   |   |
| KT946839            | JZ98/2014    | 2063             | Dog     | Serum                 | 2014 | China          |   |   |
| KY388480            | GL33         | 2063             | Dog     | Serum                 | 2015 | China          |   |   |
| KY388481            | JZ50         | 2063             | Dog     | Serum                 | 2014 | China          |   |   |
| KY388482            | GL51         | 2063             | Dog     | Serum                 | 2015 | China          |   |   |

|          |           |      |     |        |      |       |
|----------|-----------|------|-----|--------|------|-------|
| KY388483 | WM60      | 2064 | Dog | Serum  | 2015 | China |
| KY388484 | WM48      | 2064 | Dog | Serum  | 2015 | China |
| KY388485 | WM46      | 2064 | Dog | Serum  | 2015 | China |
| KY388486 | LA280     | 2063 | Dog | Serum  | 2014 | China |
| KY388487 | LA237     | 2064 | Dog | Serum  | 2014 | China |
| KY388488 | LA128     | 2063 | Dog | Serum  | 2014 | China |
| KY388489 | JZ85      | 2063 | Dog | Serum  | 2014 | China |
| KY388490 | JZ82      | 2063 | Dog | Serum  | 2014 | China |
| KY388491 | WM63      | 2064 | Dog | Serum  | 2015 | China |
| KY388492 | WM66      | 2064 | Dog | Serum  | 2015 | China |
| KY388493 | WM62      | 2064 | Dog | Serum  | 2015 | China |
| KY388494 | YL11      | 2063 | Dog | Serum  | 2016 | China |
| KY388495 | XXT243    | 2063 | Dog | Serum  | 2015 | China |
| KY388496 | XXT242    | 2063 | Dog | Serum  | 2015 | China |
| KY388497 | WM84      | 2064 | Dog | Serum  | 2015 | China |
| KY388498 | WM83      | 2063 | Dog | Serum  | 2015 | China |
| KY388499 | WM79      | 2064 | Dog | Serum  | 2015 | China |
| KY388500 | WM77      | 2064 | Dog | Serum  | 2015 | China |
| KY388501 | WM76      | 2064 | Dog | Serum  | 2015 | China |
| KY388502 | WM74      | 2064 | Dog | Serum  | 2015 | China |
| KY388503 | WM72      | 2064 | Dog | Serum  | 2015 | China |
| MF457592 | OH19098-1 | 2063 | Dog | Spleen | 2015 | USA   |
| MF797786 | XF16      | 2063 | Dog | Faeces | 2016 | China |
| MG266899 | CD17/2016 | 2063 | Dog | Faeces | 2016 | China |
| MG279118 | 102       | 2063 | NA  | NA     | 2017 | China |
| MG279119 | 199       | 2063 | NA  | NA     | 2017 | China |
| MG279120 | 198       | 2063 | NA  | NA     | 2017 | China |
| MG279121 | 186       | 2063 | NA  | NA     | 2017 | China |
| MG279122 | 176       | 2063 | NA  | NA     | 2017 | China |
| MG279123 | 185       | 2063 | NA  | NA     | 2017 | China |
| MG279124 | 183       | 2063 | NA  | NA     | 2017 | China |
| MG279125 | 182       | 2063 | NA  | NA     | 2017 | China |
| MG279126 | 181       | 2063 | NA  | NA     | 2017 | China |
| MG279127 | 180       | 2063 | NA  | NA     | 2017 | China |
| MG279128 | 179       | 2063 | NA  | NA     | 2017 | China |
| MG279129 | 178       | 2063 | NA  | NA     | 2017 | China |
| MG279130 | 177       | 2063 | NA  | NA     | 2017 | China |

|          |                |      |            |            |      |           |
|----------|----------------|------|------------|------------|------|-----------|
| MG279131 | 202            | 2063 | NA         | NA         | 2017 | China     |
| MG279132 | 398            | 2064 | NA         | NA         | 2017 | China     |
| MG279133 | 395            | 2064 | NA         | NA         | 2017 | China     |
| MG279134 | 394            | 2064 | NA         | NA         | 2017 | China     |
| MG279135 | 201            | 2063 | NA         | NA         | 2017 | China     |
| MG279136 | 391            | 2064 | NA         | NA         | 2017 | China     |
| MG279137 | 390            | 2064 | NA         | NA         | 2017 | China     |
| MG279138 | 388            | 2064 | NA         | NA         | 2017 | China     |
| MG279139 | 384            | 2064 | NA         | NA         | 2017 | China     |
| MG279140 | 205            | 2063 | NA         | NA         | 2017 | China     |
| MG279141 | 204            | 2063 | NA         | NA         | 2017 | China     |
| MG737378 | 14P105D/TH2016 | 2039 | Dog        | Lung       | 2014 | Thailand  |
| MG737379 | 15P061D/TH2016 | 1911 | Dog        | Lung       | 2015 | Thailand  |
| MG737380 | CP28/TH2016    | 1907 | Dog        | Nasal swab | 2016 | Thailand  |
| MG737381 | CP134/TH2016   | 1902 | Dog        | Nasal swab | 2016 | Thailand  |
| MG737382 | CP144/TH2016   | 1905 | Dog        | Nasal swab | 2016 | Thailand  |
| MG737383 | CP181/TH2016   | 1907 | Dog        | Nasal swab | 2016 | Thailand  |
| MG737384 | CP188/TH2016   | 1903 | Dog        | Nasal swab | 2016 | Thailand  |
| MG737385 | CP191/TH2016   | 1954 | Dog        | Nasal swab | 2016 | Thailand  |
| MG737386 | 14P112N/TH2016 | 1989 | Dog        | Lung       | 2016 | Thailand  |
| MH454599 | 09-10F/2011    | 2001 | Red fox    | Faeces     | 2011 | Italy     |
| MK033608 | UBA-Baires     | 2063 | Dog        | Lymph node | 2016 | Argentina |
| MK731981 | C24            | 2063 | Dog        | Faeces     | 2016 | China     |
| MK731982 | K1             | 2063 | Dog        | Faeces     | 2016 | China     |
| MK944079 | C79            | 2063 | Dog        | Faeces     | 2016 | China     |
| MK944080 | C85            | 2063 | Dog        | Faeces     | 2016 | China     |
| MN128702 | NC21           | 2063 | Dog        | NA         | 2018 | China     |
| MT180077 | gen-15         | 2063 | Red fox    | Spleen     | 2015 | Norway    |
| MT180078 | 19/2014        | 2063 | Red fox    | Spleen     | 2014 | Norway    |
| MT180079 | 27/2014        | 2063 | Red fox    | Spleen     | 2014 | Norway    |
| MT180080 | 64/2017        | 2063 | Red fox    | Liver      | 2017 | Norway    |
| MT180081 | 73/2017        | 2063 | Red fox    | Spleen     | 2017 | Norway    |
| MT180082 | 77/2017        | 2063 | Red fox    | Spleen     | 2017 | Norway    |
| MT180083 | feb-96         | 2063 | Arctic fox | Liver      | 1996 | Norway    |
| MT180084 | 47/1997        | 2063 | Arctic fox | Spleen     | 1997 | Norway    |
| MT180085 | 52/1999        | 2063 | Arctic fox | Spleen     | 1999 | Norway    |
| MT180086 | 55/1998        | 2063 | Arctic fox | Spleen     | 1998 | Norway    |

|                 |            |             |             |                  |             |              |
|-----------------|------------|-------------|-------------|------------------|-------------|--------------|
| MT180087        | 57/1997    | 2063        | Arctic fox  | Spleen           | 1997        | Norway       |
| MT180088        | 65/1999    | 2063        | Arctic fox  | Liver            | 1999        | Norway       |
| MT180089        | 70/1997    | 2063        | Arctic fox  | Liver            | 1997        | Norway       |
| MT180090        | 79/1997    | 2063        | Arctic fox  | Liver            | 1997        | Norway       |
| MT293519        | MED-1      | 2063        | Dog         | Faeces           | 2018        | Colombia     |
| MT293520        | MED-2      | 2063        | Dog         | Faeces           | 2018        | Colombia     |
| MT293521        | MED-3      | 2063        | Dog         | Faeces           | 2018        | Colombia     |
| <b>MW829201</b> | <b>447</b> | <b>2063</b> | <b>Wolf</b> | <b>Spleen</b>    | <b>2017</b> | <b>Italy</b> |
| <b>MW829202</b> | <b>448</b> | <b>2063</b> | <b>Wolf</b> | <b>Spleen</b>    | <b>2017</b> | <b>Italy</b> |
| <b>MW829203</b> | <b>449</b> | <b>2063</b> | <b>Wolf</b> | <b>Spleen</b>    | <b>2017</b> | <b>Italy</b> |
| <b>MW829204</b> | <b>450</b> | <b>2063</b> | <b>Wolf</b> | <b>Intestine</b> | <b>2017</b> | <b>Italy</b> |
| <b>MW829205</b> | <b>454</b> | <b>2063</b> | <b>Wolf</b> | <b>Intestine</b> | <b>2018</b> | <b>Italy</b> |
| <b>MW829206</b> | <b>457</b> | <b>2063</b> | <b>Wolf</b> | <b>Intestine</b> | <b>2018</b> | <b>Italy</b> |
| <b>MW829207</b> | <b>458</b> | <b>2063</b> | <b>Wolf</b> | <b>Intestine</b> | <b>2018</b> | <b>Italy</b> |

Note: I = sequences used for nucleotide identity, NA = not available, nt = nucleotides, P = sequences used for phylogenetic analysis.

In bold: Canine circovirus sequences obtained in this study.
